# Supplementary material
Source: bioRxiv or medRxiv preprint supplement (https://www.biorxiv.org/highwire/filestream/30936/field_highwire_adjunct_files/0/107656-1.pdf)
Supplement: Supplementary file [file 107656-1.pdf]

**Title:**

Field-based species identification in eukaryotes using single molecule, real-time sequencing.

**Authors:**

Joe Parker<sup>1\*</sup>, Dion Devey<sup>1</sup>, Andrew J. Helmstetter<sup>1</sup> & Alexander S.T. Papadopoulos<sup>1\*</sup>

<sup>1</sup>Jodrell Laboratory, Royal Botanic Gardens, Kew, Richmond, Surrey UK. TW9 3AB

\*Correspondence to [a.papadopoulos@kew.org](mailto:a.papadopoulos@kew.org) and [joe.parker@kew.org](mailto:joe.parker@kew.org)

**Keywords:**

Nanopore, SMRT, MinION, onsite DNA sequencing, phylogenomics

**Extended Data**

|                                         |                                                                                                                                                                                                   |                                                                                                                                               |                                                                                                                                         |
|-----------------------------------------|---------------------------------------------------------------------------------------------------------------------------------------------------------------------------------------------------|-----------------------------------------------------------------------------------------------------------------------------------------------|-----------------------------------------------------------------------------------------------------------------------------------------|
| <b>Species</b>                          | <i>Arabidopsis lyrata</i><br><i>ssp. petraea</i>                                                                                                                                                  | <i>A. lyrata</i>                                                                                                                              | <i>A. thaliana</i>                                                                                                                      |
| <b>Version</b>                          | 1.0                                                                                                                                                                                               | 1.0                                                                                                                                           | TAIR10                                                                                                                                  |
| <b>Date accessed</b>                    | 25/05/2016                                                                                                                                                                                        | 17/05/2016                                                                                                                                    | 17/05/2016                                                                                                                              |
| <b>Accession / ID</b>                   | <a href="http://www.ncbi.nlm.nih.gov/assembly?LinkName=bioproject_assembly_all&amp;from_uid=235280">http://www.ncbi.nlm.nih.gov/assembly?LinkName=bioproject_assembly_all&amp;from_uid=235280</a> | <a href="http://www.ncbi.nlm.nih.gov/genome/493?genome_assembly_id=29434">http://www.ncbi.nlm.nih.gov/genome/493?genome_assembly_id=29434</a> | <a href="http://www.ncbi.nlm.nih.gov/genome/4?genome_assembly_id=2492">http://www.ncbi.nlm.nih.gov/genome/4?genome_assembly_id=2492</a> |
| <b>Total assembly length</b>            | 202,972,003                                                                                                                                                                                       | 206,667,935                                                                                                                                   | 119,667,750                                                                                                                             |
| <b>Total gap length</b>                 | 20,456,163                                                                                                                                                                                        | 22,960,134                                                                                                                                    | 185,644                                                                                                                                 |
| <b>Number of scaffolds</b>              | 281,536                                                                                                                                                                                           | 695                                                                                                                                           | 7                                                                                                                                       |
| <b>Scaffold N50</b>                     | 7,848                                                                                                                                                                                             | 24,464,547                                                                                                                                    | 23,459,830                                                                                                                              |
| <b>Scaffold L50</b>                     | 6,426                                                                                                                                                                                             | 4                                                                                                                                             | 3                                                                                                                                       |
| <b>Number of contigs</b>                | 369,168                                                                                                                                                                                           | 3,645                                                                                                                                         | 102                                                                                                                                     |
| <b>Contig N50</b>                       | 2,321                                                                                                                                                                                             | 227,391                                                                                                                                       | 11,194,537                                                                                                                              |
| <b>Contig L50</b>                       | 16,831                                                                                                                                                                                            | 247                                                                                                                                           | 5                                                                                                                                       |
| <b>Total chromosomes &amp; plasmids</b> | 0                                                                                                                                                                                                 | 0                                                                                                                                             | 7                                                                                                                                       |

**Extended Data Table 1: Statistics of reference genomes used.**

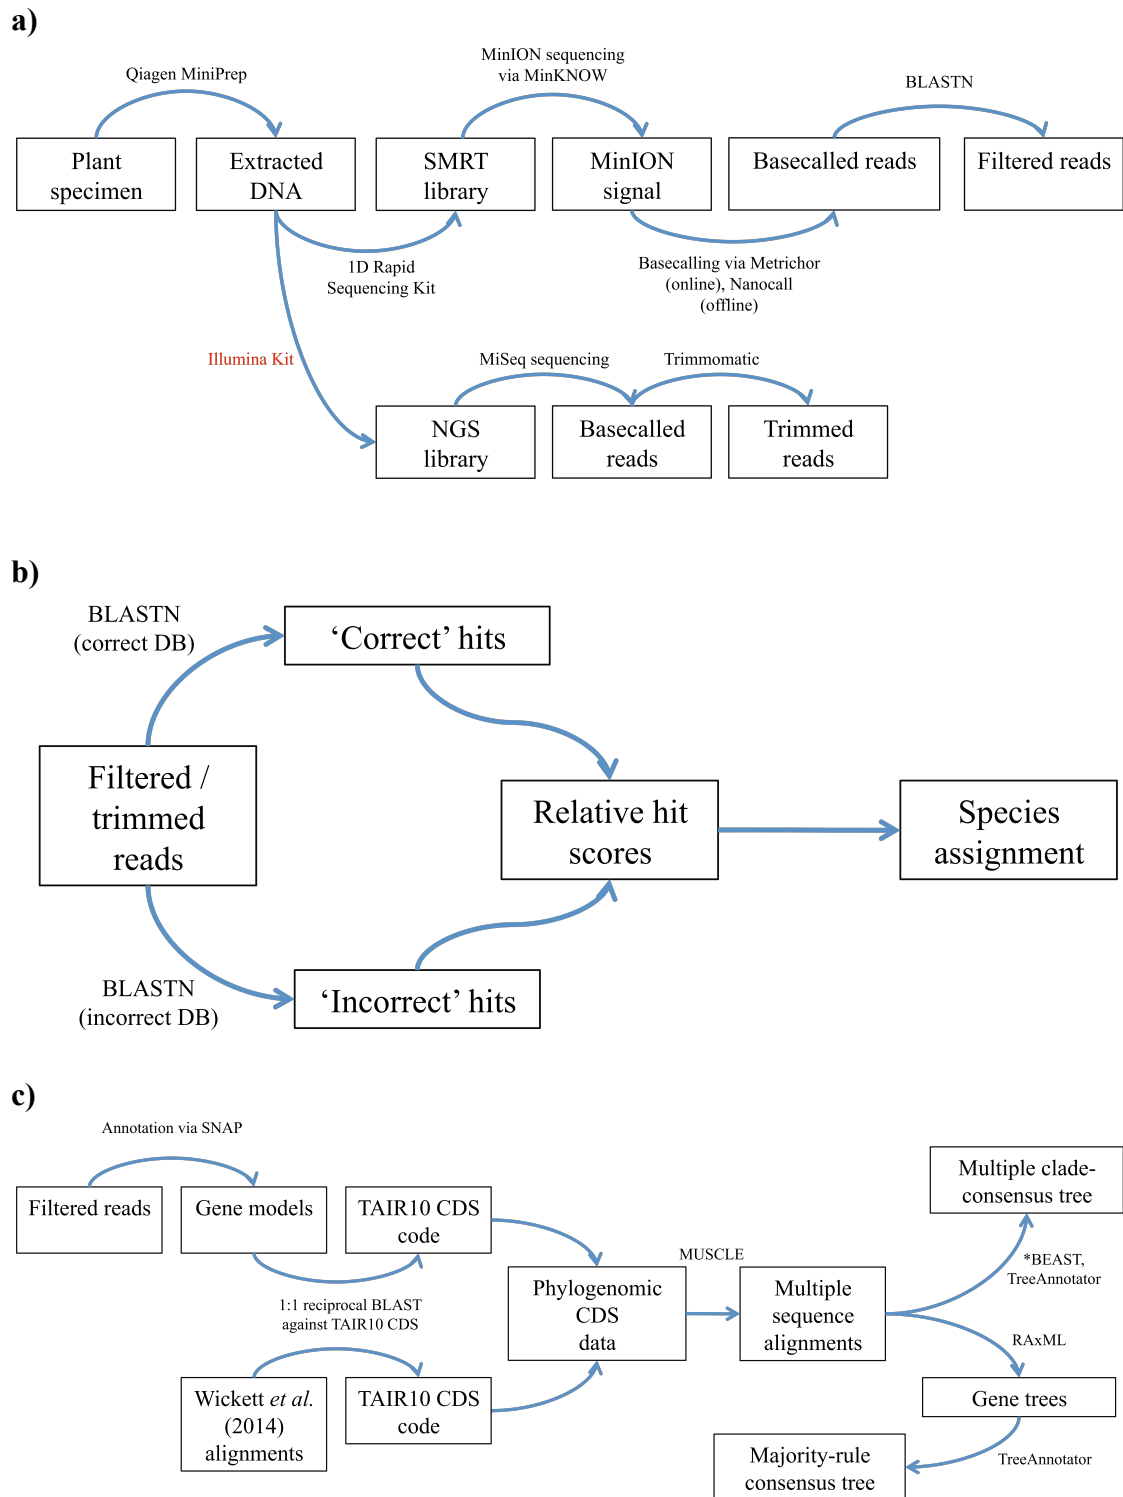

**Extended Data Figure 1: Schematic of experimental workflows.** **a**, Sampling-to-sequencing workflow. **b**, Sample identification workflow via BLASTN. **c**, Outline for direct annotation of raw SMRT reads followed by phylogenomic inference. See Methods for details.

| Species            | <i>Arabidopsis thaliana</i> | <i>Arabidopsis thaliana</i> | <i>Arabidopsis lyrata ssp. petraea</i> | <i>Arabidopsis lyrata ssp. petraea</i> | (Totals)           |
|--------------------|-----------------------------|-----------------------------|----------------------------------------|----------------------------------------|--------------------|
| Reaction chemistry | R7.3, 1D                    | R9, 1D                      | R7.3, 1D                               | R9, 1D                                 |                    |
| Run IDs            | 2507 2126<br>3637           | 5913 2144<br>0509           | 4901 1842<br>1201                      | 1222 5458<br>1958 0824<br>2912 5201    |                    |
| Start time         | 18/05/2016<br>21:36         | 18/05/2016<br>18:21         | 19/05/2016<br>16:10                    | 19/05/2016<br>16:39:20                 |                    |
| Latest read        | 19/05/2016<br>15:17:00      | 19/05/2016<br>15:18:39      | 24/05/2016<br>01:14                    | 22/05/2016<br>07:08:56                 |                    |
| Disc space (raw)   | 2.9Gb                       | 106.8Gb                     | 3.0Gb                                  | 35.1Gb                                 |                    |
| Metrichor ID       | 115360                      | 115459                      | 115375                                 | 115432                                 |                    |
| # reads            | 4,152                       | 92,693                      | 2,387                                  | 23,452                                 | <u>122,684</u>     |
| Yield: total, bp   | 7,351,585                   | 233,244,147                 | 16,092,487                             | 46,118,754                             | <u>302,806,973</u> |
| Yield: mean, bp    | 1,771                       | 2,516                       | 6,742                                  | 1,967                                  | <u>3,249</u>       |
| Yield: median, bp  | 586                         | 1,396                       | 120                                    | 305                                    | <u>602</u>         |
| Yield: min, bp     | 7                           | 5                           | 6                                      | 5                                      | <u>5</u>           |
| Yield: max, bp     | 434,377                     | 170,598                     | 1,114,970                              | 177,310                                | <u>1,114,970</u>   |
| Yield: N25, bp     | 19,244                      | 9,651                       | 574,112                                | 24,254                                 | <u>156,815</u>     |
| Yield: N50, bp     | 4,771                       | 4,410                       | 309,034                                | 7,926                                  | <u>81,535</u>      |
| Yield: N75, bp     | 2,041                       | 2,121                       | 62,360                                 | 3,374                                  | <u>17,474</u>      |

**Extended Data Table 2: Performance of MinION sequencing runs.** Yield summary statistics refer to untrimmed raw reads, including phage-lambda experimental control in the case of *A. thaliana* R9 data. See Methods for details.

|                                      | <i>A. lyrata</i><br><i>ssp. petraea</i> | <i>A. lyrata</i><br><i>ssp. petraea</i> | <i>A. thaliana</i> | <i>A. thaliana</i> |
|--------------------------------------|-----------------------------------------|-----------------------------------------|--------------------|--------------------|
| <b>ID</b>                            | AL1a                                    | AL2a                                    | AT1a               | AT2a               |
| <b>MinION<br/>repeat<sup>1</sup></b> | Y                                       |                                         |                    | Y                  |
| <b># reads<sup>2</sup></b>           | 8,143,010                               | 7,048,060                               | 8,924,824          | 8,033,488          |
| <b>Yield (bp)</b>                    | 2,451,046,010                           | 2,121,466,060                           | 2,686,372,024      | 2,418,079,888      |

**Extended Data Table 3: Performance of Illumina MiSeq sequencing runs.** Field-extracted DNA was returned to the laboratory and libraries prepared according to the manufacturer's instructions for paired-end sequencing with a 300bp insert size (see Methods.) <sup>1</sup>Samples AL1a and AT2a were also sequenced by SMRT; AL2a and AT1a were not. <sup>2</sup>Paired reads only.

| Species sample                | Reference assembly                         | Type <sup>1</sup> | Total yield (bp) | Approx. coverage <sup>2</sup> | Read depth <sup>3</sup> | Aligned length <sup>4</sup>                                                         | Nominal error <sup>4</sup> |
|-------------------------------|--------------------------------------------|-------------------|------------------|-------------------------------|-------------------------|-------------------------------------------------------------------------------------|----------------------------|
| <i>Arabidopsis thaliana</i>   | <i>A. thaliana</i>                         | ONT               | 240,597,532      | 2.01                          | 1.82                    | 54,722,05                                                                           | 0.216                      |
| <i>A. lyrata ssp. petraea</i> | <i>A. lyrata</i> <sup>5</sup>              | ONT               | 62,211,241       | 0.30                          | 4.07                    | 980,358                                                                             | 0.225                      |
| <i>A. lyrata ssp. petraea</i> | <i>A. lyrata ssp. petraea</i> <sup>6</sup> | ONT               | "                | 0.31                          | 4.36                    | 811,232                                                                             | 0.235                      |
| <i>A. thaliana</i>            | <i>A. thaliana</i>                         | ILL               | 2,418,079,888    | 20.21                         | 19.49                   | 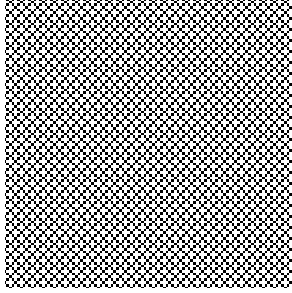 |                            |
| <i>A. lyrata ssp. petraea</i> | <i>A. lyrata</i> <sup>5</sup>              | ILL               | 2,451,046,010    | 11.86                         | 13.76                   |                                                                                     |                            |
| <i>A. lyrata ssp. petraea</i> | <i>A. lyrata ssp. petraea</i> <sup>6</sup> | ILL               | "                | 12.08                         | 14.93                   |                                                                                     |                            |

**Extended Data Table 4: Quality of sequenced reads mapped against available reference assemblies.** <sup>1</sup>ONT: Oxford Nanopore MinION 1D (rapid) Sequencing kit, developer version; ILL: Illumina MiSeq paired-end 300bp. <sup>2</sup>Gross average coverage calculated as reference length divided by yield. <sup>3</sup>Inferred from BWA read mapping. <sup>4</sup>Inferred from reads aligned by LAST. <sup>5</sup>*Arabidopsis lyrata ssp. petraea* sample against *A. lyrata* assembly. <sup>6</sup>*A. lyrata ssp. petraea* sample against *petraea ssp.* assembly. See Methods for details.

| Source data / sample 1            | A. thaliana       | A.lyrata combined <sup>1</sup> | A. thaliana       | A.lyrata combined |
|-----------------------------------|-------------------|--------------------------------|-------------------|-------------------|
| Pairwise comparison               | A.lyrata combined | A. thaliana                    | A.lyrata combined | A. thaliana       |
| Source data                       | ONT 1D            | ONT 1D                         | MiSeq             | MiSeq             |
| # Reads, total                    | 91,715            | 25,839                         | 9,476,598         | 9,659,489         |
| # Reads, 1-way TRUE <sup>2</sup>  | 10,322            | 76                             | 2,140,403         | 2,907,921         |
| # Reads, 1-way FALSE <sup>3</sup> | 378               | 2                              | 53,056            | 24,329            |
| # Reads, 2-way BOTH <sup>4</sup>  | 22,386            | 101                            | 7,098,032         | 6,256,969         |
| # Reads, ZERO hits <sup>5</sup>   | 58,629            | 25,660                         | 185,107           | 470,270           |
| Proportion false both             | 0.639             | 0.993                          | 0.020             | 0.049             |
| Proportion true 1-way             | 0.113             | 0.003                          | 0.226             | 0.301             |
| Proportion false 1-way            | 0.004             | 0.000                          | 0.006             | 0.003             |
| Proportion 2-way (both)           | 0.244             | 0.004                          | 0.749             | 0.648             |
| <b>Biases<sup>6</sup>:</b>        |                   |                                |                   |                   |
| Cumulative <sup>7</sup> length    | 29,636,139        | 70,523                         | 355,442,635       | 417,433,705       |
| Cumulative identities             | 24,958,479        | 58,090                         | 409,528,919       | 448,987,073       |
| Cumulative % identities           | 850,070           | 6,203                          | 128,227,752       | 162,303,707       |
| Cumulative E-values               | 0.01              | 0.01                           | 0.05              | 0.01              |
| Mean <sup>8</sup> length          | 1,323.87          | 698.25                         | 83.61             | 108.99            |
| Mean identities                   | 1,115             | 575                            | 96                | 117               |
| Mean % identities                 | 37.97             | 61.41                          | 30.16             | 42.38             |
| Mean E-values                     | 4.80E-07          | 1.05E-04                       | 1.07E-08          | 3.52E-09          |

### Extended Data Table 5: Sample identification via BLASTN.

Notes: <sup>1</sup>*A. lyrata* and *A. lyrata ssp. petraea* databases combined, see Supplementary Information; <sup>2</sup>Total number of reads matching only conspecific database ('true-positives'); <sup>3</sup>Total number of reads matching only pairwise-compared database ('false-positives' in the case of a mixed /multiplexed sample, or 'false-negatives' in the case of a single sample); <sup>4</sup>Total number of reads matching both databases – further analysis would ordinarily be required; <sup>5</sup>Total number of reads with no hits in either comparison, e.g. 'false-negatives'; <sup>6</sup>Difference statistics for each query read calculated as (score conspecific comparison – score pairwise comparison), for BLASTN alignment length, alignment identities, alignment % identities and *E*-value; <sup>8</sup>Cumulative bias across all reads; <sup>7</sup>Mean bias across all reads.

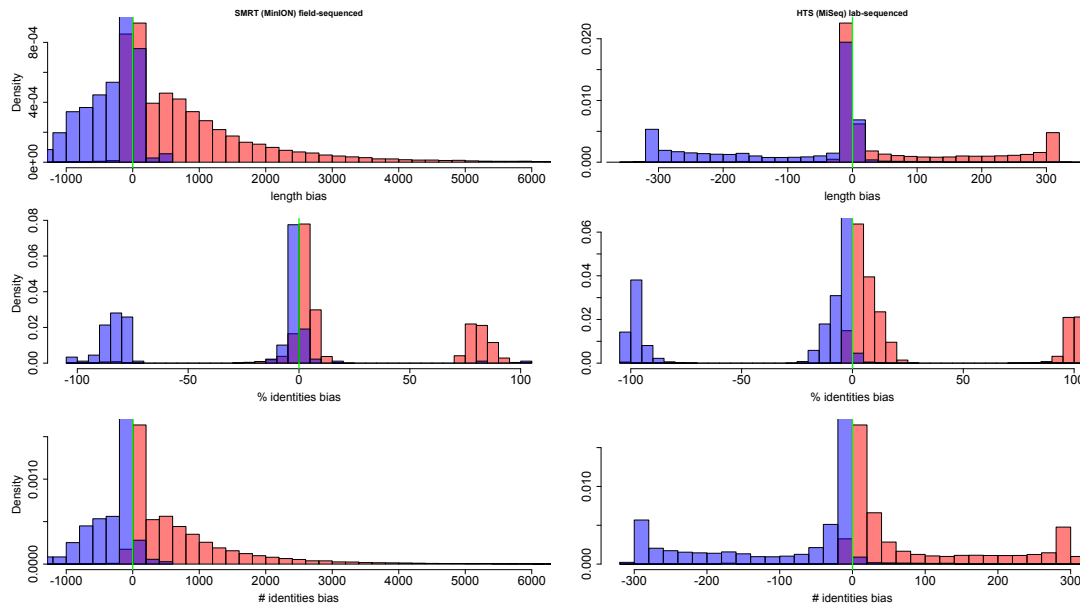

**Extended Data Figure 2: Distribution of difference statistics in BLASTN comparisons for congeneric species ID.** Performance of test statistics for each-way congeneric sample ID (binary classification) using BLASTN evaluated for MinION (*left column*) and MiSeq (*right column*) platforms. Difference (test) statistics were calculated for each alignment as (true positive (TP) score – false positive (FP) score) for each of length, % identities and number of identities (product of length \* % identities). For reads matching a single database only, a T or F assignment was made and difference statistic calculated by masking unobserved alignment scores as 'extreme' (-1 each for length and % identities, 999 for *e*-value). Reads sequenced from *A. thaliana* samples (comprising nominal true positives and false-positives (contaminants) are shown in red; reads from *A. lyrata* samples (nominal true negatives) shown in blue.



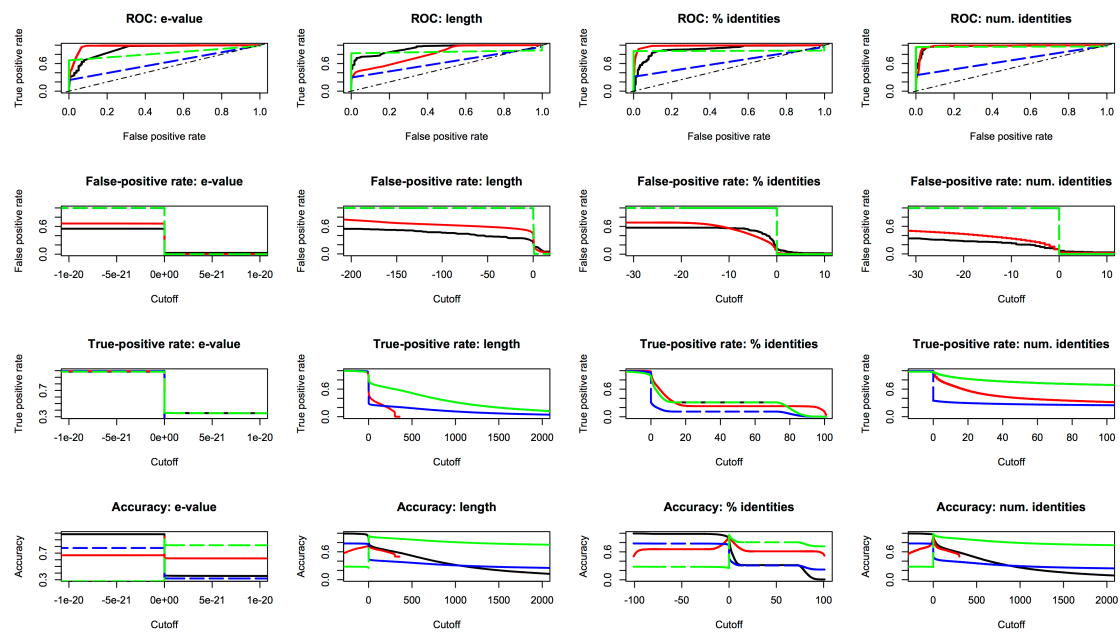

**Extended Data Figure 3: Performance of difference statistics in BLASTN comparisons for congeneric species ID.** Performance of test statistics for each-way congeneric sample ID (binary classification) using BLASTN evaluated for MinION (*black*) and MiSeq (*red*) platforms. Difference (test) statistics were calculated for each alignment as (true positive (TP) score – false positive (FP) score) for each of e-value, length, % identities and number of identities. For reads matching a single database only, a T or F assignment was made and difference statistic calculated by masking unobserved alignment scores as 'extreme' (-1 each for length and % identities, 999 for e-value). Reads that produced no hits to either database might represent false negatives (sequencing error, or genomic regions not represented in the reference genome BLAST databases) or true negatives (sequencing contaminants and sequencer noise). To evaluate the effect of including these nonmatching reads, all were coded with either 'false' labels and difference statistic values of zero (dashed green lines), or labelled 'false' in the case of reads sequenced from *A. lyrata* and 'true' for reads sequenced from *A. thaliana* (blue dashed lines). *Top row*: true-positive (TP) vs false-positive (FP) rate; classical receiver operating curve. *Second row*: FP rate with varying test statistic cutoff. *Third row*: TP rate with varying test statistic cutoff. *Bottom row*: Accuracy with varying test statistic cutoff. Accuracy estimated as  $(TP+TN / (P + N))$ . *Columns (L-R)*: Difference statistics for e-value, total alignment length, % identities, and number of identities, respectively. See Methods for details.

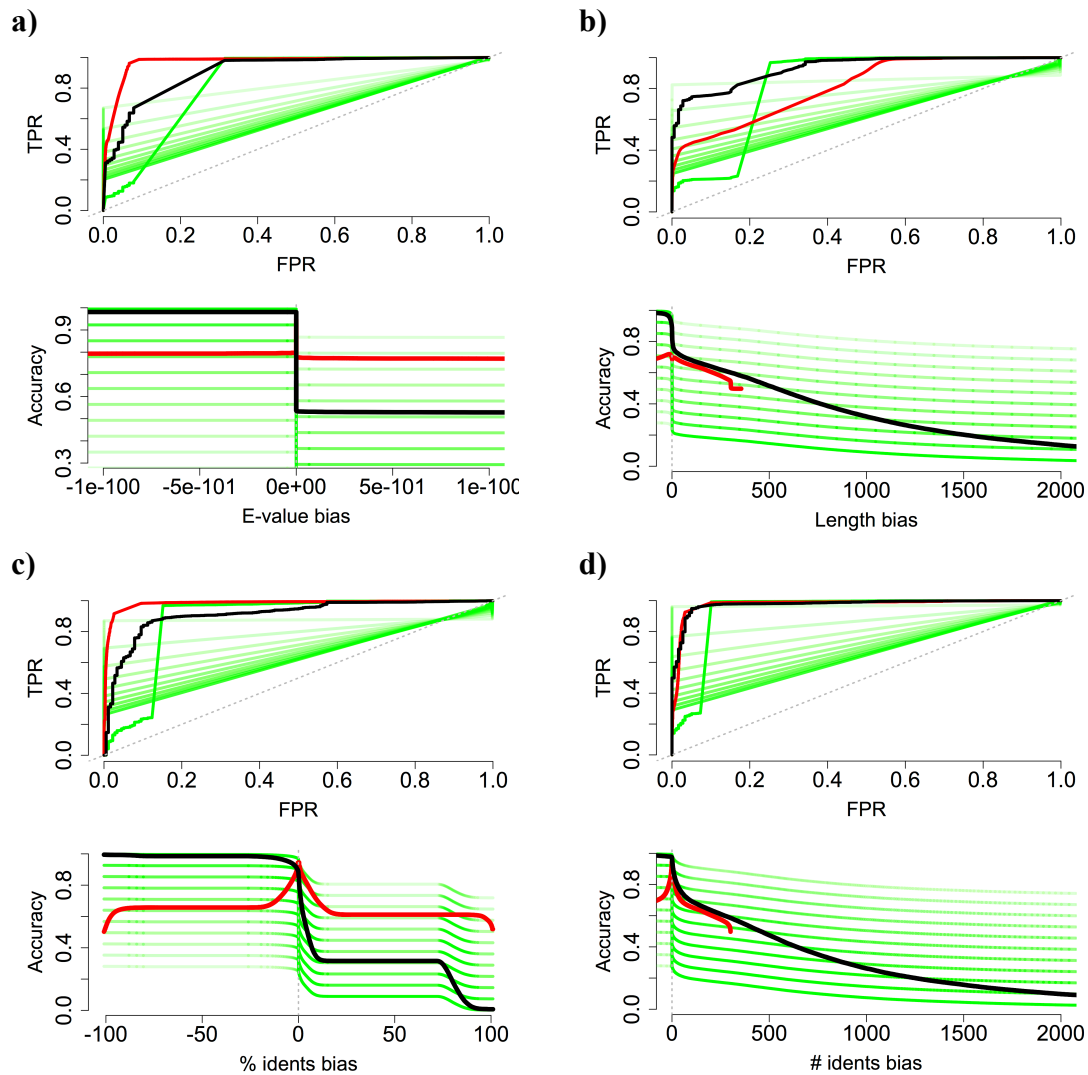

**Extended Data Figure 4: Modelling potential affect of incorrectly estimated TN/FN proportions.** Red and black lines show empirically estimated statistical performance for species ID via BLASTN comparison of HTS and SMRT reads respectively (see Methods for details). Reads that produced no hits to either database might represent false negatives (sequencing error, or genomic regions not represented in the reference genome BLAST databases) or true negatives (sequencing contaminants and sequencer noise). To model the effect of including these nonmatching reads, dummy rows (one for each nonmatching read SMRT read: 58,629 from the *A. thaliana* experiment, and 25,660 from the *A. lyrata* experiment) were coded with ‘false’ labels and difference statistic values of zero. Proportions of these dummy reads were recoded with ‘true’ labels from 0-100% in 10% increments and classifier statistical performance was recalculated and plotted (shown in green; TN:FN mixtures by 10% increments shown from light to dark green shading). Plots (a-d) show results for bias statistics in *E*-value; total alignment length; % identities; and total alignment identities, respectively.

| Species                                                        | Arabidopsis thaliana     |                   | A. lyrata ssp. petraea   |                   |
|----------------------------------------------------------------|--------------------------|-------------------|--------------------------|-------------------|
| Data                                                           | MiSeq,<br>300bp          | MiSeq +<br>MinION | MiSeq                    | MiSeq +<br>MinION |
| Assembler <sup>1</sup>                                         | Abyss                    | hybridSPAdes      | Abyss                    | hybridSPAdes      |
| Illumina MiSeq NGS reads<br>(300bp paired-end)                 | 8,033,488                | 8,033,488         | 8,143,010                | 8,143,010         |
| NGS total yield                                                | 2,418,079,888            | 2,418,079,888     | 2,451,046,010            | 2,451,046,010     |
| Oxford Nanopore MinION SMRT<br>reads, R7.3 + R9, N50 ~ 4,410bp | n/a                      | 96,845            | n/a                      | 25,839            |
| SMRT reads total yield                                         | n/a                      | 240,597,532       | n/a                      | 62,211,241        |
| # contigs                                                      | 24,999                   | 10,644            | 37,568                   | 85,599            |
| Largest contig                                                 | 89,717                   | 413,462           | 101,114                  | 38,313            |
| Total length                                                   | 106,455,313              | 119,031,857       | 151,562,895              | 117,256,694       |
| Reference length                                               | 119,667,750 <sup>2</sup> | 119,667,750       | 183,707,801 <sup>3</sup> | 183,707,801       |
| N50 <sup>4</sup>                                               | 7,853                    | 48,730            | 9,605                    | 1,686             |
| Unaligned length                                               | 7,121,882                | 6,737,059         | 36,669,847               | 35,287,390        |
| Genome fraction (%)                                            | 82.0                     | 88.7              | 53.4                     | 43.7              |
| Duplication ratio                                              | 1.01                     | 1.058             | 1.17                     | 1.02              |
| # N's per 100 kbp                                              | 1.72                     | 5.41              | 0.22                     | 7.09              |
| # mismatches / 100 kbp                                         | 518                      | 588               | 1,297                    | 1,097             |
| # indels / 100 kbp                                             | 120                      | 130               | 334                      | 271               |
| Largest alignment                                              | 76,935                   | 264,039           | 44,515                   | 17,201            |
| Total aligned length                                           | 98,382,255               | 108,086,256       | 100,502,092              | 80,814,492        |
| <i>Coding loci completeness<sup>5</sup>:</i>                   |                          |                   |                          |                   |
| # genes, 'complete'                                            | <b>219</b>               | <b>245</b>        | n/a                      | n/a               |
| % genes, 'complete'                                            | 88.31%                   | 98.79%            |                          |                   |
| # genes 'partial'                                              | <b>238</b>               | <b>246</b>        | n/a                      | n/a               |
| % genes, 'partial'                                             | 95.97%                   | 99.19%            |                          |                   |

**Extended Data Table 6: Performance of *de novo* genome assembly on NGS and SMRT data.** <sup>1</sup>*de novo* genome assemblies used either lab-sequenced short-read NGS data only (Abyss) or both NGS and field-sequenced SMRT datasets (Hybrid-SPAdes). <sup>2</sup>TAIR10 release. <sup>3</sup>INSDC: *A. lyrata*: ADBK00000000.1 (Hu *et al.*, 2011); *A. lyrata ssp. petraea*: BASP00000000.1 (Akama *et al.*, 2014). <sup>4</sup>Assembly statistics

calculated using QCAST 4.0.<sup>5</sup> Approximate completeness of coding loci assessed via CEGMA. See Methods for details.
